# Supplementary material for: Transvenous phrenic nerve stimulation improves central sleep apnea, sleep quality, and quality of life regardless of prior positive airway pressure treatment
Source: PubMed Central journal article supplement (PMC8590675; doi:10.1007/s11325-021-02335-x), 2021-03-20
Supplement: 11325_2021_2335_MOESM1_ESM.pdf [file 11325_2021_2335_MOESM1_ESM.pdf]

Sleep and Breathing electronic supplement for:

**Transvenous Phrenic Nerve Stimulation improves central sleep apnea, sleep quality and quality of life regardless of prior positive airway pressure-treatment**

Alan R. Schwartz, MD<sup>a,b</sup>; Lee R. Goldberg, MD, MPH<sup>a</sup>; Scott McKane, MS<sup>c</sup>; Timothy I. Morgenthaler, MD<sup>d</sup>

<sup>a</sup>University of Pennsylvania Perelman School of Medicine; <sup>b</sup>Universidad Peruana Cayetano Heredia (Lima, Peru); <sup>c</sup>Respicardia, Inc., Minnetonka, Minnesota; <sup>d</sup>Mayo Clinic, Rochester, MN

**Correspondence:**

Alan R. Schwartz MD  
Email: aschwar02@gmail.com

**Table 1. Polysomnogram and Clinical Metrics - Prior PAP-treated**

| Endpoint                                                                                                   | 6 Months of Therapy      |                          |                             | 12 Months of Therapy |                           |
|------------------------------------------------------------------------------------------------------------|--------------------------|--------------------------|-----------------------------|----------------------|---------------------------|
|                                                                                                            | Baseline<br>(N=53)       | Result<br>(N=45)         | Change from<br>baseline     | Result<br>(N=41)     | Change from<br>baseline   |
| Apnea Hypopnea Index<br>(events/hour)                                                                      | 52 [35, 63]              | 20 [10, 31]              | -29 [-40, -11]<br><.001     | 16 [10, 32]          | -30 [-45, -7]<br><.001    |
| Central Apnea Index<br>(events/hour)                                                                       | 30 [17, 47]              | 3 [1, 8]                 | -25 [-40, -12]<br><.001     | 2 [0, 6]             | -24 [-48, -15]<br><.001   |
| Obstructive Apnea<br>Index (events/hour)                                                                   | 2 [0, 4]                 | 3 [1, 5]                 | 1 [-1, 4]<br>0.017          | 2 [1, 5]             | 0 [-1, 3]<br>0.076        |
| Mixed Apnea Index<br>(events/hour)                                                                         | 1 [0, 5]                 | 0 [0, 1]                 | -1 [-5, 0]<br>0.002         | 0 [0, 1]             | -1 [-5, -0]<br><.001      |
| Hypopnea Index<br>(events/hour)                                                                            | 12 [2, 19]               | 9 [4, 15]                | 0 [-9, 3]<br>0.621          | 10 [6, 19]           | 2 [-7, 7]<br>0.562        |
| 4% Oxygen<br>Desaturation Index<br>(events/hour)                                                           | 45 [33, 61]              | 16 [8, 32]               | -25 [-39, -12]<br><.001     | 16 [8, 27]           | -26 [-42, -6]<br><.001    |
| Arousal Index<br>(events/hour)                                                                             | 39 [30, 54]              | 20 [12, 29]              | -17 [-30, -9]<br><.001      | 18 [14, 26]          | -18 [-32, -8]<br><.001    |
| Percent of Sleep with<br>O2 Saturation<90% (%)                                                             | 12 [4, 27]               | 3 [0, 17]                | -3 [-17, 1]<br>0.003        | 5 [1, 13]            | -5 [-13, -0]<br><.001     |
| Percent of Sleep in N1<br>(% of sleep)                                                                     | 33 [19, 42]              | 21 [13, 29]              | -10 [-16, 1]<br><.001       | 21 [14, 27]          | -7 [-17, 3]<br>0.023      |
| Percent of Sleep in N2<br>(% of sleep)                                                                     | 51 [42, 58]              | 57 [50, 65]              | 5 [-1, 13]<br>0.001         | 58 [48, 65]          | 4 [-5, 12]<br>0.116       |
| Percent of Sleep in N3<br>(% of sleep)                                                                     | 3 [0, 7]                 | 2 [0, 7]                 | 0 [-2, 2]<br>0.622          | 2 [0, 7]             | 0 [-1, 1]<br>0.784        |
| Percent of Sleep in<br>REM (% of sleep)                                                                    | 10 [5, 16]               | 15 [10, 21]              | 3 [-2, 6]<br>0.052          | 15 [6, 21]           | 4 [-5, 8]<br>0.251        |
| Epworth Sleepiness<br>Scale (points)                                                                       | 12 [7, 16]               | 7 [4, 11]                | -3 [-6, 0]<br><.001         | 8 [5, 10]            | -3 [-8, 0]<br><.001       |
| Fatigue Severity Scale                                                                                     | 5.2 [3.4, 6.2]<br>(n=53) | 4.7 [3.2, 5.4]<br>(n=47) | -0.4 [-1.3, 0.4]<br>P=0.017 | 4.6 [3.3, 6.0]       | -0.2 [-1.4, 0.6]<br>0.084 |
| Median [Q1,Q3] / Nominal 2-sided p-value from Wilcoxon Signed-Rank test for change from baseline to visit. |                          |                          |                             |                      |                           |

**Table 2. Polysomnogram and Clinical Metrics - PAP-naive**

| Endpoint                                                                                                   | 6 Months of Therapy      |                          |                            | 12 Months of Therapy |                           |
|------------------------------------------------------------------------------------------------------------|--------------------------|--------------------------|----------------------------|----------------------|---------------------------|
|                                                                                                            | Baseline (N=93)          | Result (N=81)            | Change from baseline       | Result (N=78)        | Change from baseline      |
| Apnea Hypopnea Index (events/hour)                                                                         | 41 [31, 56]              | 20 [9, 35]               | -18 [-35, -6]<br><.001     | 19 [9, 34]           | -19 [-33, -6]<br><.001    |
| Central Apnea Index (events/hour)                                                                          | 21 [12, 36]              | 1 [0, 5]                 | -17 [-27, -8]<br><.001     | 1 [0, 4]             | -17 [-30, -10]<br><.001   |
| Obstructive Apnea Index (events/hour)                                                                      | 2 [1, 4]                 | 3 [1, 9]                 | 1 [-1, 6]<br><.001         | 4 [1, 10]            | 2 [-1, 6]<br><.001        |
| Mixed Apnea Index (events/hour)                                                                            | 1 [0, 4]                 | 0 [0, 0]                 | -1 [-3, 0]<br><.001        | 0 [0, 1]             | -1 [-3, 0]<br><.001       |
| Hypopnea Index (events/hour)                                                                               | 12 [4, 20]               | 7 [2, 17]                | -1 [-7, 5]<br>0.273        | 8 [4, 17]            | -1 [-7, 7]<br>0.582       |
| 4% Oxygen Desaturation Index (events/hour)                                                                 | 35 [24, 51]              | 20 [7, 33]               | -12 [-28, -2]<br><.001     | 17 [8, 29]           | -15 [-29, -3]<br><.001    |
| Arousal Index (events/hour)                                                                                | 40 [27, 57]              | 21 [15, 31]              | -14 [-28, -4]<br><.001     | 22 [15, 35]          | -12 [-33, -4]<br><.001    |
| Percent of Sleep with O2 Saturation<90% (%)                                                                | 7 [2, 19]                | 5 [1, 16]                | -2 [-7, 2]<br>0.026        | 3 [1, 12]            | -3 [-9, 1]<br><.001       |
| Percent of Sleep in N1 (% of sleep)                                                                        | 35 [21, 49]              | 27 [18, 38]              | -4 [-19, 5]<br>0.004       | 28 [19, 40]          | -4 [-18, 4]<br>0.002      |
| Percent of Sleep in N2 (% of sleep)                                                                        | 45 [40, 56]              | 51 [40, 64]              | 4 [-6, 16]<br>0.020        | 53 [44, 59]          | 4 [-3, 13]<br>0.005       |
| Percent of Sleep in N3 (% of sleep)                                                                        | 2 [0, 10]                | 2 [0, 11]                | 0 [-3, 2]<br>0.272         | 1 [0, 5]             | 0 [-4, 1]<br>0.015        |
| Percent of Sleep in REM (% of sleep)                                                                       | 10 [6, 16]               | 13 [9, 19]               | 1 [-3, 8]<br>0.003         | 13 [8, 21]           | 3 [-2, 11]<br><.001       |
| Epworth Sleepiness Scale (points)                                                                          | 8 [5, 13]                | 6 [3, 9]                 | -2 [-6, 0]<br><.001        | 5 [3, 8]             | -3 [-6, 0]<br><.001       |
| Fatigue Severity Scale                                                                                     | 4.4 [3.3, 5.7]<br>(n=93) | 3.4 [2.3, 4.8]<br>(n=83) | -0.5 [-1.9, 0.2]<br>P<.001 | 3.4 [2.4, 5.1]       | -0.5 [-1.6, 0.4]<br>0.003 |
| Median [Q1,Q3] / Nominal 2-sided p-value from Wilcoxon Signed-Rank test for change from baseline to visit. |                          |                          |                            |                      |                           |

**Table 3. Patient Global Assessment**

| Endpoint (N=14)                            | Prior PAP-treated |             | PAP-naive   |             |
|--------------------------------------------|-------------------|-------------|-------------|-------------|
|                                            | 6 Months          | 12 Months   | 6 Months    | 12 Months   |
| Any improvement in<br>PGA (%) <sup>a</sup> | 85% (40/47)       | 84% (36/43) | 72% (60/83) | 74% (60/81) |

<sup>a</sup> Reported as percent (n/N).

PGA = Patient global assessment

**Table 4. Comparison of Results from 6 Month Randomized Period of Trial**

| Variable                                           | Prior PAP-treated                            |                                                 |                              | PAP-naive                                    |                                                 |                              |
|----------------------------------------------------|----------------------------------------------|-------------------------------------------------|------------------------------|----------------------------------------------|-------------------------------------------------|------------------------------|
|                                                    | TPNS<br>Change<br>from<br>baseline<br>(n=25) | Control<br>Change<br>from<br>baseline<br>(n=22) | Between<br>group p-<br>value | TPNS<br>Change<br>from<br>baseline<br>(n=36) | Control<br>Change<br>from<br>baseline<br>(n=51) | Between<br>group p-<br>value |
| Apnea hypopnea index<br>(events/hour)              | -27<br>-40, -12                              | 1<br>-5, 16                                     | <.001                        | -20<br>-37, -8                               | 0<br>-10, 15                                    | <.001                        |
| Central apnea index<br>(events/hour)               | -30<br>-45, -13                              | 1<br>-10, 11                                    | <.001                        | -17<br>-32, -12                              | -3<br>-12, 7                                    | <.001                        |
| Arousal Index (events/hour)                        | -17<br>-28, -7                               | 1<br>-6, 12                                     | 0.002                        | -20<br>-33, -8                               | -4<br>-20, 2                                    | <.001                        |
| Percent of sleep with oxygen<br>saturation<90% (%) | -3<br>-17, 2                                 | 2<br>-4, 6                                      | 0.020                        | -4<br>-9, 0                                  | 0<br>-8, 4                                      | 0.052                        |
| Percent of sleep in rapid eye<br>movement (%)      | 1<br>-5, 5                                   | -2<br>-7, 2                                     | 0.263                        | 1<br>-3, 8                                   | 0<br>-4, 4                                      | 0.085                        |
| Epworth Sleepiness Scale<br>(points)               | -4<br>-7, 0                                  | 1<br>-1, 2                                      | 0.004                        | -2<br>-6, 0                                  | 0<br>-3, 3                                      | 0.002                        |

Reported as median and interquartile range.

P-value from Mann-Whitney test for difference in change from baseline between groups (2-sided).

TPNS = Transvenous phrenic nerve stimulation
